# Supplementary material for: Hierarchical Nickel Cobalt Phosphide @ Carbon Nanofibers Composite Microspheres: Ultrahigh Energy Densities of Electrodes for Supercapacitors
Source: MDPI journal article supplement (doi:10.3390/nano13222927), 2023-11-10
Supplement: s1 [file s1]

# Hierarchical Nickel Cobalt Phosphide @ Carbon Nanofibers Composite Microspheres: Ultrahigh Energy Densities of Electrodes for Supercapacitors

Jinqiao Zhang, Meiling Cen, Tao Wei, Qianyun Wang and Jing Xu \*

College of Materials and Metallurgy, Guizhou University, Guiyang 550025, China

\* Correspondence: jxu8@gzu.edu.cn

## Supporting Figures:

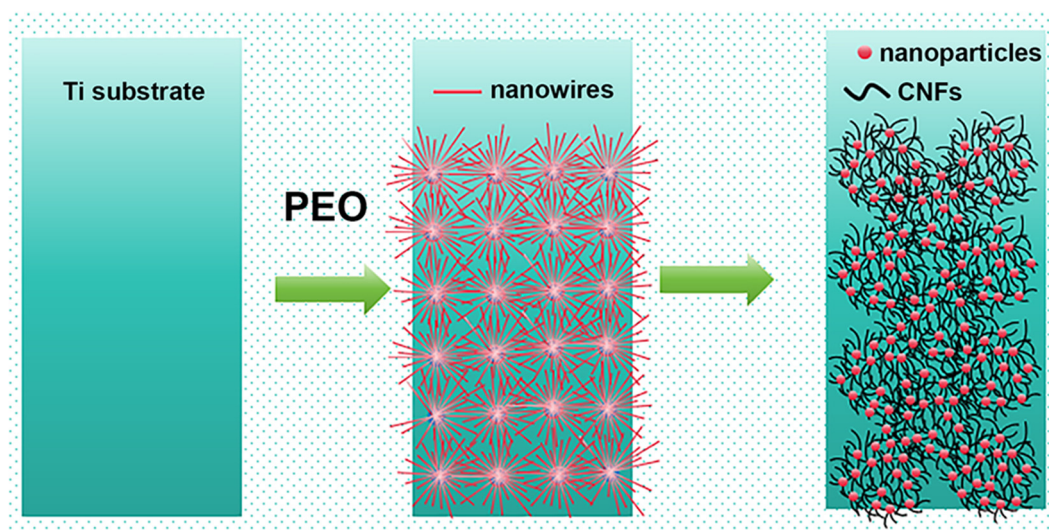

**Figure S1.** Schematic illustration of synthesis CoNiP@CNFs nanocomposites on a Ti substrate.

**Table S1.** Chemical composition of used electrolytes for PEO process.

| Name                | Chemical formula                                             | Concentration (M) | Molecular weight<br>(g/mol) |
|---------------------|--------------------------------------------------------------|-------------------|-----------------------------|
| Sodium tetraborate  | $\text{Na}_2\text{B}_4\text{O}_7 \cdot 10\text{H}_2\text{O}$ | 0.034             | 381.38                      |
| Trisodium phosphate | $\text{Na}_3\text{PO}_4 \cdot 12\text{H}_2\text{O}$          | 0.066             | 380.12                      |
| Sodium tungstate    | $\text{Na}_2\text{WO}_4 \cdot 2\text{H}_2\text{O}$           | 0.006             | 329.85                      |
| Calcium acetate     | $\text{C}_4\text{H}_6\text{CaO}_4 \cdot \text{H}_2\text{O}$  | 0.025             | 176.18                      |
| Nickel acetate      | $\text{C}_4\text{H}_6\text{NiO}_4 \cdot 4\text{H}_2\text{O}$ | 0.06              | 248.84                      |

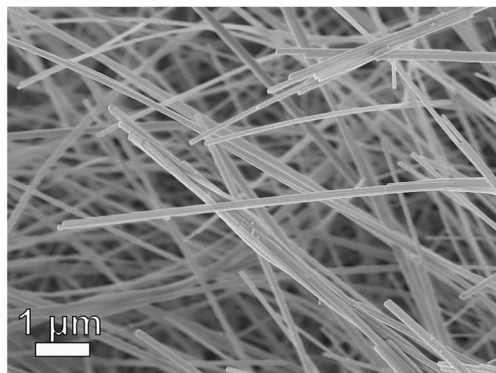

**Figure S2.** SEM image of  $\text{Ni}_5\text{TiO}_7$  nanowires.

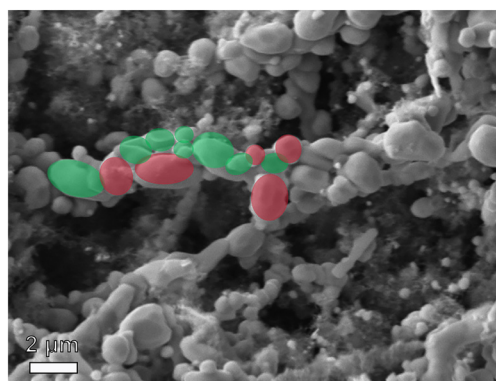

**Figure S3.** SEM image of  $(\text{Ni}_{1-x}\text{Co}_x)\text{TiO}_7$  nanowires subjected to CVD for 10 minutes in  $\text{C}_2\text{H}_2$  atmosphere.

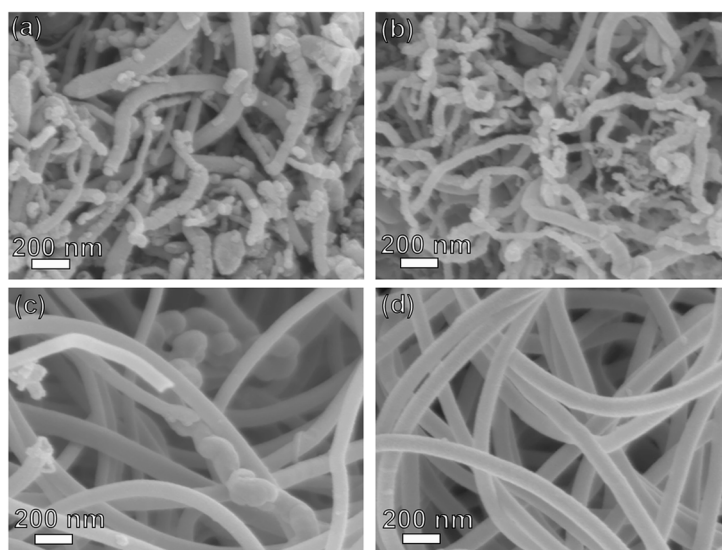

**Figure S4.** SEM images of a  $(\text{Ni}_{1-x}\text{Co}_x)\text{TiO}_7$  film after the TCVD treatment at 700 °C in  $\text{C}_2\text{H}_2$  atmosphere of (a) 3.75 torr, (b) 7.5 torr, (c) 37.5 torr and (d) 75 torr for 90 min.

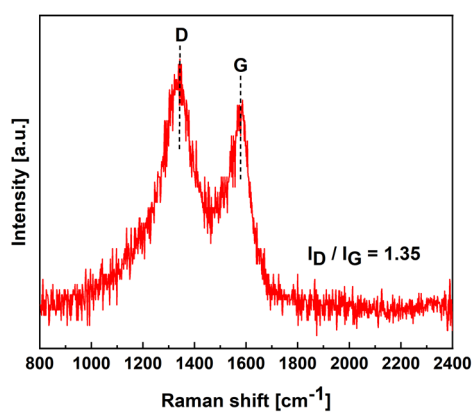

**Figure S5.** Raman spectroscopy of NiP@CNFs nanocomposites.

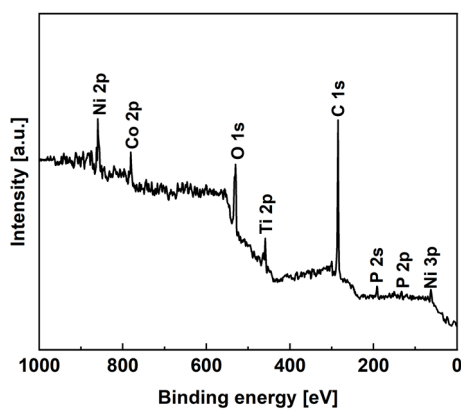

**Figure S6.** XPS survey spectrum of the CoNiP@CNFs nanocomposites.

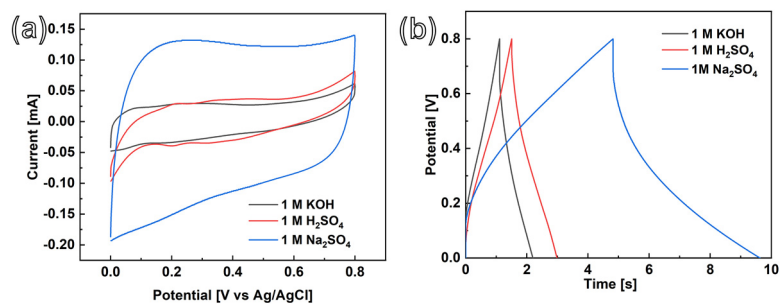

**Figure S7.** (a) CV and (b) GCD curves of CoNiP@CNFs nanocomposites in different electrolytes.

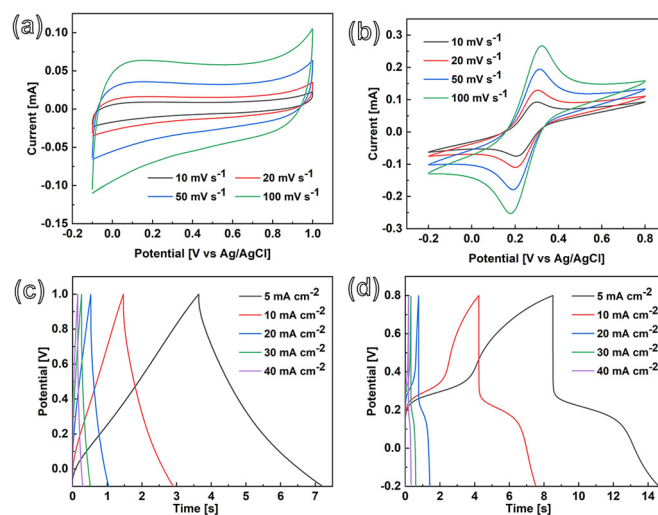

**Figure S8.** (a, b) CV and (c, d) GCD curves in (a, c) 1.0 M  $\text{Na}_2\text{SO}_4$  and (b, d) 0.05 M  $\text{Fe}(\text{CN})_6^{3-/4-}$  + 1.0 M  $\text{Na}_2\text{SO}_4$  electrolyte solution of NiP@CNFs nanocomposites.

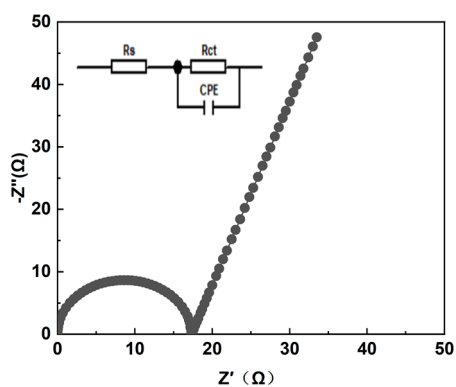

**Figure S9.** The EIS curve of NiP@CNFs nanocomposites.

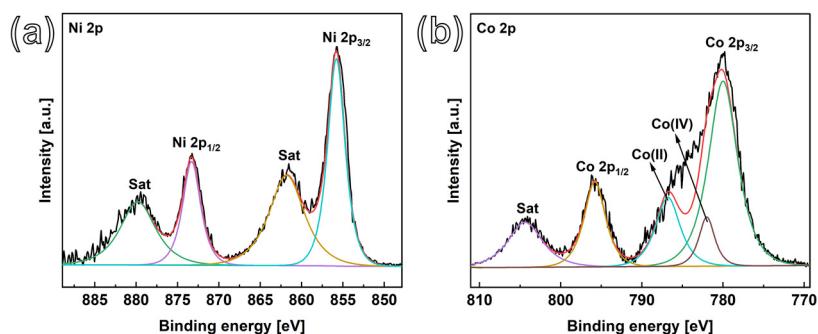

**Figure S10.** XPS spectra of (a) Ni 2p, (b) Co 2p core levels of CoNiP@CNFs composite after cycle life test.

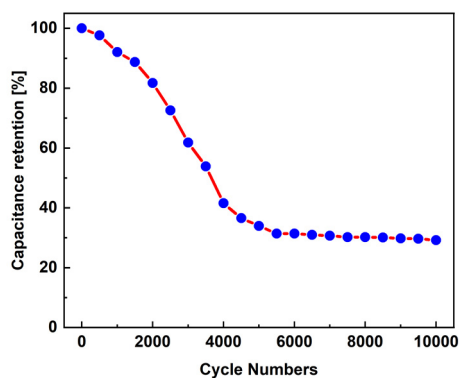

**Figure S11.** Capacitance retention of a CoNiP based (without growth of CNFs) electrode in 1.0 M Na<sub>2</sub>SO<sub>4</sub> solution.

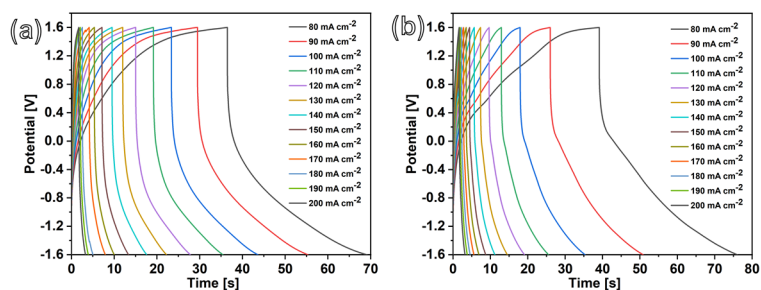

**Figure S12.** GCD curves of CoNiP@CNFs in (a) 1.0 M Na<sub>2</sub>SO<sub>4</sub> and (b) 1.0 M Na<sub>2</sub>SO<sub>4</sub> + 0.05 M Fe(CN)<sub>6</sub><sup>3-/4-</sup> solution at various current densities from 80 to 200 mA cm<sup>-2</sup>.

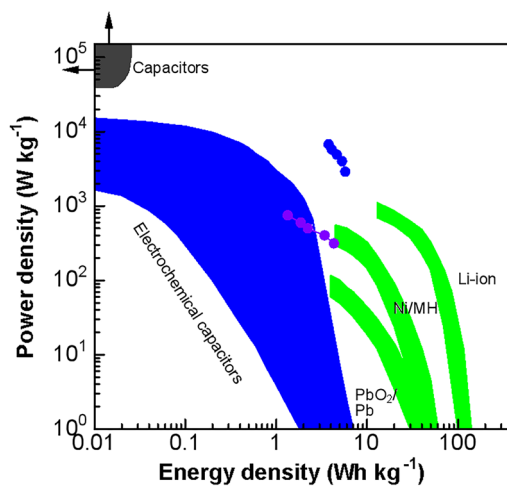

**Figure S13.** Comparison of Ragone plots of the NiP@CNFs based EDLCs in 1.0 M Na<sub>2</sub>SO<sub>4</sub> (purple dotted line) and based PCs in 0.05 M Fe (CN)<sub>6</sub><sup>3-/4-</sup> + 1.0 Na<sub>2</sub>SO<sub>4</sub> (blue dotted line) with those of traditional capacitors, ECs and batteries [S1]

## References

S1. Simon, P.; Gogotsi, Y. Materials for electrochemical capacitors. *Nat. Mater* **2008**, *7*, 845-854.
